# Supplementary material for: Integrating the interactome and the transcriptome of Drosophila
Source: PubMed Central journal article supplement (PMC4229734; doi:10.1186/1471-2105-15-177), 2014-06-10
Supplement: 1471-2105-15-177-S1.pdf [file 1471-2105-15-177-S1.pdf]

|                                    | <b>adult tissue-specific<br/>(2838)</b> | <b>adult tissue-NUNS (5830)</b> | <b>adult tissue-ubiquitous<br/>(3960)</b> |
|------------------------------------|-----------------------------------------|---------------------------------|-------------------------------------------|
| <b>stage-specific<br/>(3566)</b>   | 1363                                    | 1546                            | 41                                        |
| <b>stage-NUNS<br/>(6064)</b>       | 1353                                    | 2419                            | 536                                       |
| <b>stage-ubiquitous<br/>(4972)</b> | 49                                      | 1290                            | 3226                                      |
