# Supplementary material for: Integrating the interactome and the transcriptome of Drosophila
Source: PubMed Central journal article supplement (PMC4229734; doi:10.1186/1471-2105-15-177), 2014-06-10

A

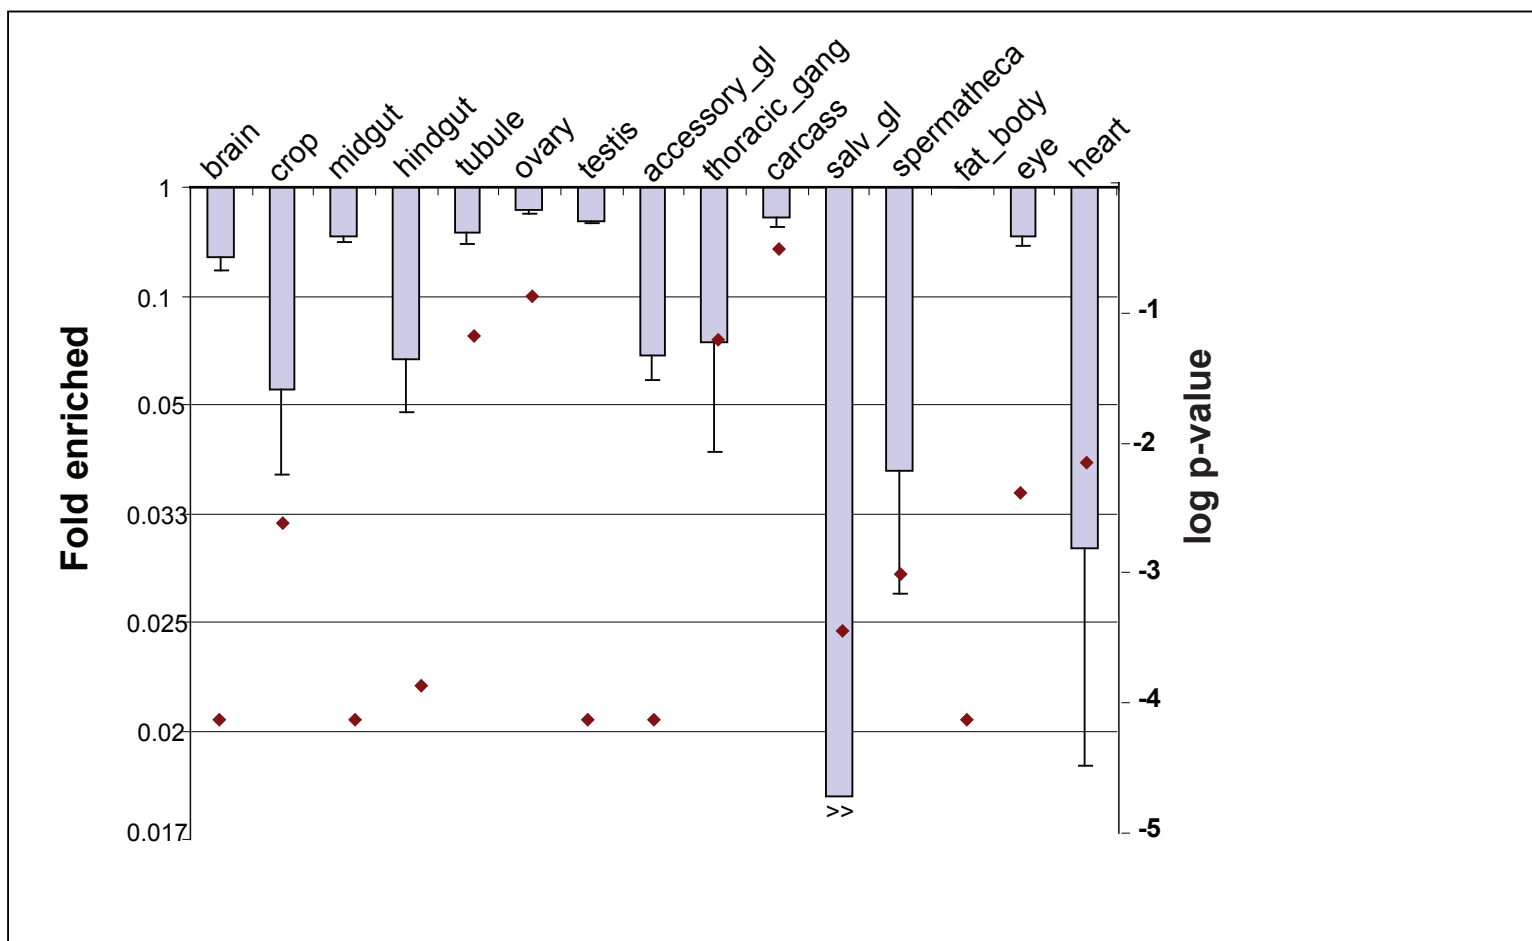

B

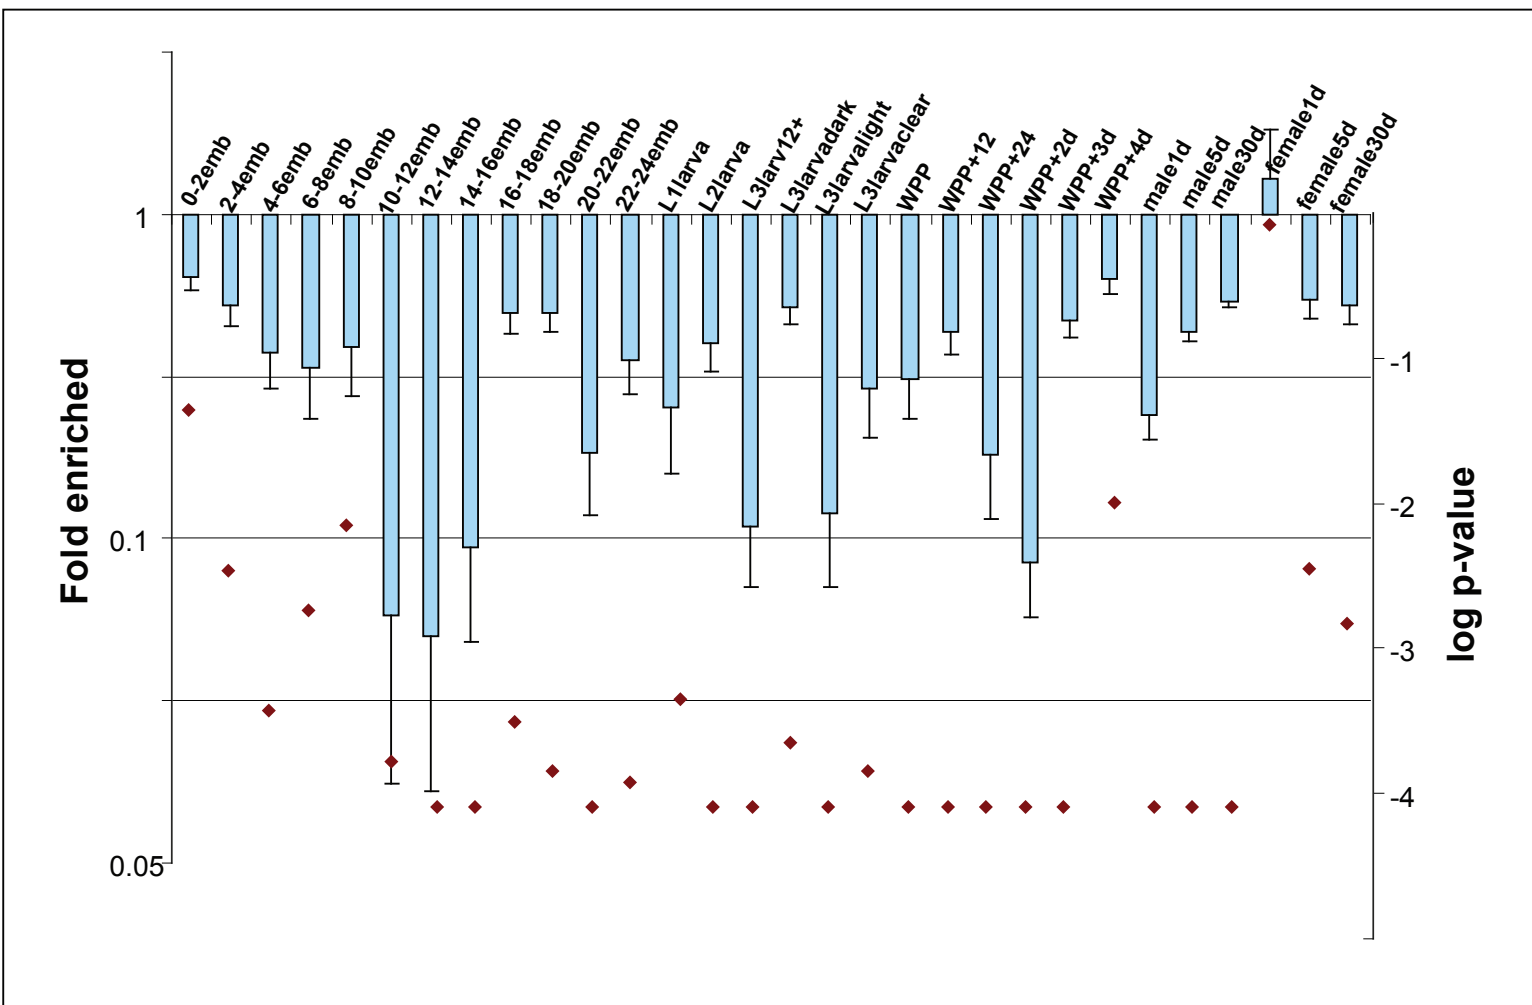

Supplement: 1471-2105-15-177-S4.pdf [file 1471-2105-15-177-S4.pdf]
