# Supplementary material for: Integrating the interactome and the transcriptome of Drosophila
Source: PubMed Central journal article supplement (PMC4229734; doi:10.1186/1471-2105-15-177), 2014-06-10
Supplement: 1471-2105-15-177-S6.pdf [file 1471-2105-15-177-S6.pdf]

| <b>Tissue</b>          | <b>PDI</b> | <b>predicted PDI</b> |
|------------------------|------------|----------------------|
| <b>brain</b>           | 0.03       | 4.67E-05             |
| <b>crop</b>            | -          | 9.70E-04             |
| <b>midgut</b>          | -          | 0.11                 |
| <b>hindgut</b>         | -          | 0.76                 |
| <b>ovary</b>           | 0.17       | 0.05                 |
| <b>testis</b>          | 1          | 1.92E-05             |
| <b>accessory gl</b>    | 0.99       | 0.12                 |
| <b>thoracic gang</b>   | 0.17       | 6.00E-03             |
| <b>salivary gl</b>     | 1          | 0.25                 |
| <b>eye</b>             | -          | 0.21                 |
| <b>heart</b>           | 0.04       | 0.93                 |
| <b>0-2 hr embryo</b>   | 0.93       | 0.13                 |
| <b>2-4 hr embryo</b>   | 1.92E-05   | 1.92E-05             |
| <b>4-6 hr embryo</b>   | 1.92E-05   | 1.92E-05             |
| <b>6-8 hr embryo</b>   | 1.00E-03   | 1.92E-05             |
| <b>8-10 hr embryo</b>  | 0.5        | 1.50E-04             |
| <b>14-16 hr embryo</b> | -          | 1.92E-05             |
| <b>16-18 hr embryo</b> | -          | 1.92E-05             |
| <b>18-20 hr embryo</b> | 0.05       | 1.92E-05             |
