# Supplementary material for: Integrating the interactome and the transcriptome of Drosophila
Source: PubMed Central journal article supplement (PMC4229734; doi:10.1186/1471-2105-15-177), 2014-06-10
Supplement: 1471-2105-15-177-S7.pdf [file 1471-2105-15-177-S7.pdf]

| <b>gene_list</b>       | <b># brain</b> | <b># ovary</b> | <b># testis</b> | <b># thoracic gang</b> | <b># larval CNS</b> | <b># eye</b> |
|------------------------|----------------|----------------|-----------------|------------------------|---------------------|--------------|
| <b>average</b>         | 2020           | 1907           | 2119            | 1732                   | 2211                | 1462         |
| <b>pmax 50</b>         | 2754           | 3469           | 2704            | 2437                   | 2984                | 1598         |
| <b>pmax 75</b>         | 1525           | 2502           | 2277            | 1087                   | 1532                | 703          |
| <b>total expressed</b> | 7527           | 6452           | 8148            | 7124                   | 7598                | 7222         |
